# Supplementary material
Source: ML conference proceedings conference paper supplement (https://proceedings.mlr.press/v80/gibson18a.html)
Supplement: Supplementary file [file gibson18a-supp.pdf]

---

## Supplementary Material: Robust and Scalable Models of microbiome Dynamics

---

Travis E. Gibson Georg K. Gerber

### A. Extended discussion regarding constraining dynamics

We present an analysis of a naive model that directly constrains dynamics to be non-negative, to illustrate the issues this causes for the posterior distribution. Consider a dynamical process with latent state  $\mathbf{x}$ , measurements  $\mathbf{y}$ , and dynamical interaction coefficients  $\mathbf{a}$ :

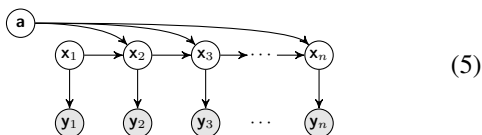

generated by the following

$$\begin{aligned} \mathbf{x}_{k+1,i} \mid \mathbf{x}_k, \mathbf{a} &\sim \text{Normal}_{\geq 0}(\mathbf{a}_i^\top f(\mathbf{x}_k), \sigma_{\mathbf{x}_i}^2) \\ \mathbf{y}_{k,i} \mid \mathbf{x}_{k,i} &\sim \text{Normal}_{\geq 0}(\mathbf{x}_{k,i}, \sigma_{\mathbf{y}_i}^2) \\ \mathbf{a}_i &\sim \text{Normal}(0, \sigma_{\mathbf{a}_i}^2). \end{aligned} \quad (6)$$

The dynamics in (6) are precisely the dynamics one obtains via adding a truncated normal measurement model to the discrete gLV dynamics presented in (1).<sup>1</sup> For ease of exposition let us assume for now that there is only 1 microbial species ( $i = 1$  and thus index  $i$  can be dropped for this brief exposition) and all of the variance terms in (6) are equal to  $\sigma^2$ . Performing full Bayesian inference for  $\mathbf{a}$  requires constructing the posterior  $p_{\mathbf{a}|\mathbf{x}} \propto p_{\mathbf{x}|\mathbf{a}}p_{\mathbf{a}}$ . Noting that the likelihood of  $\mathbf{x}$  satisfies the following proportionality  $p_{\mathbf{x}|\mathbf{a}} \propto \prod_k p_{\mathbf{x}_{k+1}|\mathbf{a}, \mathbf{x}_k}$  and expanding this given our model in (6) we have

$$p_{\mathbf{x}|\mathbf{a}}(x \mid a) \propto \prod_k \frac{e^{-\frac{1}{2\sigma^2}(x_{k+1} - a^\top f(x_k))^2}}{\sigma\sqrt{2\pi} \left( \Phi(\infty) - \Phi\left(-\frac{a^\top f(x_k)}{\sigma}\right) \right)} \quad (7)$$

where  $\Phi$  is the Cumulative Distribution Function (CDF) for standard Normal distribution. Using the likelihood in (7)

<sup>1</sup>Note that this is the most direct way one can enforce a hard non-negativity constraint on the dynamics, and is indeed the first direction we took before realizing the challenges it imposes.

and the prior for  $\mathbf{a}$  in (6), the posterior of  $\mathbf{a}$  takes the form

$$p_{\mathbf{a}|\mathbf{x}}(a \mid x) \propto \prod_k \frac{e^{-\frac{1}{2\sigma^2}(x_{k+1} - a^\top f(x_k))^2}}{\sigma\sqrt{2\pi} \left( \Phi(\infty) - \Phi\left(-\frac{a^\top f(x_k)}{\sigma}\right) \right)} \frac{e^{-\frac{1}{2\sigma^2} a^\top a}}{(\sigma^2 2\pi)^{n_a/2}}$$

where  $n_a$  is the dimension of the column vector  $a$ . Having the variable  $a$  appear in the normalization constant means we cannot directly Gibbs sample  $\mathbf{a}$ , and also makes constructing an efficient proposal distribution in a Metropolis Hastings (MH) setting challenging too, as the proposal will in turn be affecting the scaling factor of the target distribution. A similar issue is encountered when trying to sample from the latent state  $\mathbf{x} \mid \mathbf{a}, \mathbf{y}$  (filtering).
